# Supplementary material for: RETRACTED: Ascertaining the Influence of Lacto-Fermentation on Changes in Bovine Colostrum Amino and Fatty Acid Profiles
Source: MDPI journal article supplement (doi:10.3390/ani13193154), 2023-10-09
Supplement: s1 [file s1]

## Supplementary Files

**Table S1.** Significance (p) of the analysed factors (different agricultural company and different LAB strains used for fermentation) and their interaction on amino acids (AA) and gamma amino-butyric acid (GABA) content in bovine colostrum.

| Dependent Variable                                                                | Significance (p) of the analysed factors and their interaction |                                   |                                 |
|-----------------------------------------------------------------------------------|----------------------------------------------------------------|-----------------------------------|---------------------------------|
|                                                                                   | Agricultural company                                           | LAB strains used for fermentation | Interaction of analysed factors |
| Arginine                                                                          | <0.001                                                         | 0.180                             | <0.001                          |
| Glutamine                                                                         | 0.357                                                          | 0.204                             | 0.181                           |
| Glutamic acid                                                                     | 0.004                                                          | 0.459                             | 0.394                           |
| Serine                                                                            | <0.001                                                         | 0.442                             | <0.001                          |
| Aspartic acid                                                                     | <0.001                                                         | <0.001                            | <0.001                          |
| Threonine                                                                         | 0.006                                                          | 0.017                             | 0.003                           |
| Glycine                                                                           | 0.012                                                          | 0.001                             | 0.001                           |
| Alanine                                                                           | <0.001                                                         | <0.001                            | 0.033                           |
| Proline                                                                           | 0.112                                                          | 0.250                             | 0.006                           |
| Valine                                                                            | <0.001                                                         | 0.350                             | 0.239                           |
| Methionine                                                                        | <0.001                                                         | <0.001                            | <0.001                          |
| Phenylalanine                                                                     | <0.001                                                         | 0.043                             | <0.001                          |
| Leucine and isoleucine                                                            | 0.013                                                          | 0.322                             | 0.299                           |
| Lysine                                                                            | <0.001                                                         | <0.001                            | <0.001                          |
| Histidine                                                                         | <0.001                                                         | 0.016                             | <0.001                          |
| Tyrosine                                                                          | <0.001                                                         | <0.001                            | <0.001                          |
| Gamma-aminobutyric acid                                                           | 0.105                                                          | <0.001                            | <0.001                          |
| Influence of the factor on dependent variable is significant when $p \leq 0.05$ . |                                                                |                                   |                                 |

**Table S2.** Pearson correlations (r) between amino acids (AA) content with lactic acid bacteria (LAB) viable counts and pH of samples, and their significance (p).

| Amino acids            | pH      |       | Lactic acid bacteria viable counts |       |
|------------------------|---------|-------|------------------------------------|-------|
|                        | r       | p     | r                                  | p     |
| Arginine               | -0.161  | 0.291 | 0.176                              | 0.248 |
| Glutamine              | -0.174  | 0.254 | 0.051                              | 0.741 |
| Glutamic acid          | -0.140  | 0.358 | 0.296*                             | 0.049 |
| Serine                 | -0.084  | 0.587 | 0.066                              | 0.670 |
| Aspartic acid          | 0.148   | 0.331 | 0.065                              | 0.671 |
| Threonine              | 0.076   | 0.618 | 0.170                              | 0.265 |
| Glycine                | 0.422** | 0.004 | 0.197                              | 0.195 |
| Alanine                | 0.409** | 0.005 | 0.124                              | 0.418 |
| Proline                | -0.124  | 0.417 | 0.186                              | 0.221 |
| Valine                 | -0.060  | 0.693 | 0.207                              | 0.173 |
| Methionine             | -0.182  | 0.232 | 0.126                              | 0.410 |
| Phenylalanine          | -0.050  | 0.744 | 0.151                              | 0.321 |
| Leucine and isoleucine | 0.010   | 0.948 | 0.123                              | 0.420 |
| Lysine                 | 0.074   | 0.627 | 0.207                              | 0.172 |
| Histidine              | -0.176  | 0.248 | 0.140                              | 0.359 |
| Tyrosine               | 0.009   | 0.954 | 0.167                              | 0.273 |
| GABA                   | 0.026   | 0.864 | 0.214                              | 0.158 |

r – Pearson correlation; p – significance.

\*\* Correlation is significant at the 0.01 level (2-tailed).

\* Correlation is significant at the 0.05 level (2-tailed).

**Table S3.** Pearson correlations (r) between biogenic amine (BA) content with lactic acid bacteria (LAB) viable counts, pH of the samples, amino acids (AA) and gamma-aminobutyric acid (GABA) concentration, and their significance (p).

| Amino acids,<br>gamma-aminobutyric<br>acid, lactic acid<br>bacteria count,<br>samples pH | Biogenic amine  |                  |                  |              |                 |                  |                 |              |                |              |                              |              |
|------------------------------------------------------------------------------------------|-----------------|------------------|------------------|--------------|-----------------|------------------|-----------------|--------------|----------------|--------------|------------------------------|--------------|
|                                                                                          | Tryptamine      |                  | Phenylethylamine |              | Putrescine      |                  | Cadaverine      |              | Tyramine       |              | Total biogenic amine content |              |
|                                                                                          | r               | p                | r                | p            | r               | p                | r               | p            | r              | p            | r                            | p            |
| pH                                                                                       | -0.069          | 0.654            | -0.143           | 0.349        | -0.004          | 0.979            | -0.091          | 0.551        | 0.312*         | 0.037        | 0.041                        | 0.791        |
| Lactic acid bacteria count                                                               | -0.119          | 0.437            | 0.057            | 0.708        | 0.007           | 0.966            | -0.036          | 0.815        | 0.010          | 0.946        | -0.144                       | 0.344        |
| Arginine                                                                                 | -0.229          | 0.130            | -0.086           | 0.576        | <b>0.321*</b>   | <b>0.031</b>     | -0.047          | 0.761        | -0.054         | 0.722        | 0.062                        | 0.684        |
| Glutamine                                                                                | 0.178           | 0.243            | -0.077           | 0.616        | <b>0.144</b>    | <b>0.346</b>     | 0.091           | 0.552        | -0.247         | 0.102        | 0.088                        | 0.567        |
| Glutamic acid                                                                            | -0.148          | 0.333            | -0.100           | 0.512        | <b>-0.353*</b>  | <b>0.017</b>     | <b>-0.356*</b>  | <b>0.017</b> | -0.110         | 0.473        | <b>-0.410**</b>              | <b>0.005</b> |
| Serine                                                                                   | -0.096          | 0.535            | 0.042            | 0.784        | <b>-0.434**</b> | <b>0.003</b>     | <b>-0.356*</b>  | <b>0.018</b> | -0.260         | 0.088        | <b>-0.349*</b>               | <b>0.020</b> |
| Aspartic acid                                                                            | 0.009           | 0.955            | -0.248           | 0.101        | <b>-0.453**</b> | <b>0.002</b>     | <b>-0.384**</b> | <b>0.009</b> | <b>-0.369*</b> | <b>0.013</b> | <b>-0.342*</b>               | <b>0.021</b> |
| Threonine                                                                                | -0.032          | 0.836            | -0.159           | 0.295        | 0.037           | 0.809            | -0.240          | 0.113        | -0.202         | 0.183        | 0.131                        | 0.390        |
| Glycine                                                                                  | -0.288          | 0.055            | 0.089            | 0.563        | <b>0.312*</b>   | <b>0.037</b>     | 0.012           | 0.935        | 0.231          | 0.127        | 0.132                        | 0.386        |
| Alanine                                                                                  | <b>-0.337*</b>  | <b>0.024</b>     | 0.219            | 0.149        | <b>0.330*</b>   | <b>0.027</b>     | 0.037           | 0.808        | <b>0.324*</b>  | <b>0.030</b> | 0.269                        | 0.074        |
| Proline                                                                                  | 0.036           | 0.816            | 0.050            | 0.745        | -0.035          | 0.819            | -0.251          | 0.097        | -0.259         | 0.086        | -0.102                       | 0.504        |
| Valine                                                                                   | -0.129          | 0.397            | -0.185           | 0.223        | -0.256          | 0.090            | <b>-0.449**</b> | <b>0.002</b> | -0.244         | 0.107        | <b>-0.318*</b>               | <b>0.034</b> |
| Methionine                                                                               | -0.085          | 0.578            | 0.188            | 0.217        | <b>-0.361*</b>  | <b>0.015</b>     | -0.245          | 0.105        | -0.277         | 0.066        | <b>-0.332*</b>               | <b>0.026</b> |
| Phenylalanine                                                                            | -0.088          | 0.566            | -0.126           | 0.408        | <b>-0.475**</b> | <b>&lt;0.001</b> | <b>-0.408**</b> | <b>0.005</b> | -0.198         | 0.192        | <b>-0.395**</b>              | <b>0.007</b> |
| Leucine and isoleucine                                                                   | -0.126          | 0.410            | -0.057           | 0.711        | -0.288          | 0.055            | <b>-0.337*</b>  | <b>0.023</b> | -0.144         | 0.347        | -0.237                       | 0.117        |
| Lysine                                                                                   | <b>-0.0306*</b> | <b>0.041</b>     | <b>-0.376*</b>   | <b>0.011</b> | -0.093          | 0.544            | <b>-0.299*</b>  | <b>0.046</b> | -0.069         | 0.654        | -0.165                       | 0.278        |
| Histidine                                                                                | 0.114           | 0.455            | -0.162           | 0.289        | <b>-0.536**</b> | <b>&lt;0.001</b> | <b>-0.458**</b> | <b>0.002</b> | <b>-0.367*</b> | <b>0.013</b> | <b>-0.449**</b>              | <b>0.002</b> |
| Tyrosine                                                                                 | <b>-0.568**</b> | <b>&lt;0.001</b> | -0.176           | 0.246        | 0.003           | 0.983            | -0.220          | 0.146        | 0.102          | 0.503        | -0.083                       | 0.590        |
| Gamma-aminobutyric acid                                                                  | 0.055           | 0.718            | 0.126            | 0.410        | -0.307*         | 0.040            | -0.361*         | 0.015        | -0.030         | 0.845        | <b>-0.305*</b>               | <b>0.042</b> |

r – Pearson correlation; p – significance.

\*\* Correlation is significant at the 0.01 level (2-tailed).

\* Correlation is significant at the 0.05 level (2-tailed).

The values in Bold are significant.

**Table S4.** Significance (p) of the analysed factors (different agricultural company and different LAB strains used for fermentation) and their interaction on biogenic amine (BA) content in bovine colostrum.

| Dependent Variable                                                                | Significance (p) of the analysed factors and their interaction |                                   |                                             |
|-----------------------------------------------------------------------------------|----------------------------------------------------------------|-----------------------------------|---------------------------------------------|
|                                                                                   | Agricultural company                                           | LAB strains used for fermentation | Interaction of duration of analysed factors |
| Tryptamine                                                                        | <b>&lt;0.001</b>                                               | <b>&lt;0.001</b>                  | <b>&lt;0.001</b>                            |
| Phenylethylamine                                                                  | <b>0.004</b>                                                   | <b>&lt;0.001</b>                  | <b>&lt;0.001</b>                            |
| Putrescine                                                                        | <b>&lt;0.001</b>                                               | <b>0.037</b>                      | <b>0.008</b>                                |
| Cadaverine                                                                        | <b>0.026</b>                                                   | <b>0.009</b>                      | 0.300                                       |
| Tyramine                                                                          | <b>0.002</b>                                                   | 0.134                             | 0.258                                       |
| Total biogenic amine content                                                      | <b>&lt;0.001</b>                                               | 0.214                             | 0.507                                       |
| Influence of the factor on dependent variable is significant when $p \leq 0.05$ . |                                                                |                                   |                                             |
| The values in Bold are significant.                                               |                                                                |                                   |                                             |

**Table S5.** Significance (p) of the analysed factors (different agricultural company and different LAB strains used for fermentation) and their interaction on fatty acid (FA) content in bovine colostrum.

| Dependent Variable | Significance (p) of the analysed factors and their interaction |                                   |                                             |
|--------------------|----------------------------------------------------------------|-----------------------------------|---------------------------------------------|
|                    | Agricultural company                                           | LAB strains used for fermentation | Interaction of duration of analysed factors |
| C4:0               | 0.151                                                          | 0.693                             | 0.467                                       |
| C6:0               | <b>&lt;.0001</b>                                               | <b>0.004</b>                      | <b>0.013</b>                                |
| C8:0               | <b>0.002</b>                                                   | 0.140                             | 0.107                                       |
| C10:0              | <b>&lt;0.001</b>                                               | <b>&lt;0.001</b>                  | <b>&lt;0.001</b>                            |
| C11:0              | 0.328                                                          | <b>&lt;0.001</b>                  | 0.329                                       |
| C12:0              | 0.429                                                          | <b>&lt;0.001</b>                  | 0.460                                       |
| C13:0              | 0.095                                                          | <b>&lt;0.001</b>                  | 0.058                                       |
| C14:0              | 0.798                                                          | 0.117                             | 0.844                                       |
| C14:1              | 0.410                                                          | <b>&lt;0.001</b>                  | 0.426                                       |
| C15:0              | 0.240                                                          | <b>&lt;0.001</b>                  | 0.130                                       |
| C15:1              | 0.052                                                          | <b>&lt;0.001</b>                  | <b>0.025</b>                                |
| C16:0              | 0.724                                                          | <b>0.007</b>                      | 0.920                                       |
| C16:1              | 1.000                                                          | <b>&lt;0.001</b>                  | 1.000                                       |
| C17:0              | 0.185                                                          | <b>&lt;0.001</b>                  | 0.942                                       |
| C17:1              | <b>0.037</b>                                                   | <b>&lt;0.001</b>                  | <b>0.015</b>                                |
| C18:0              | 0.762                                                          | <b>&lt;0.001</b>                  | 0.269                                       |
| C18:1              | 0.772                                                          | <b>&lt;0.001</b>                  | 0.886                                       |
| C18:2              | 0.065                                                          | <b>&lt;0.001</b>                  | 0.208                                       |
| C18:3 $\alpha$     | 0.075                                                          | <b>&lt;0.001</b>                  | 0.251                                       |
| C20:4              | 0.896                                                          | <b>&lt;0.001</b>                  | 0.973                                       |

C4:0 – butyric; C6:0 – caproic; C8:0 – caprylic; C10:0 – capric; C11:0 – undecanoic; C12:0 – lauric; C13:0 – tridecanoic; C14:0 – myristic; C14:1 – myristoleic; C15:0 – pentadecanoic; C15:1 – *cis*-10-pentadecenoic; C16:0 – palmitic; C16:1 – palmitoleic; C17:0 – heptadecanoic; C17:1 – *cis*-10-heptadecenoic; C18:0 – stearic; C18:1 – oleic; C18:2 – linoleic; C18:3  $\alpha$  –  $\alpha$ -linolenic; C20:4 – arachidonic.

Influence of the factor on dependent variable is significant when  $p \leq 0.05$ .

The values in Bold are significant.
